# Supplementary material for: Perturbation of METTL1-mediated tRNA N7- methylguanosine modification induces senescence and aging
Source: PubMed Central journal article supplement (PMC11231295; doi:10.1038/s41467-024-49796-8), 2024-07-08
Supplement: 41467_2024_49796_MOESM1_ESM.pdf [file 41467_2024_49796_MOESM1_ESM.pdf]

## Perturbation of METTL1-Mediated tRNA N<sup>7</sup>- Methylguanosine Modification Induces Senescence and Aging

Yudong Fu<sup>1,2,3,4#</sup>, Fan Jiang<sup>2,3,4#</sup>, Xiao Zhang<sup>1,2,3,4</sup>, Yingyi Pan<sup>5</sup>, Rui Xu<sup>6</sup>, Xiu Liang<sup>2,3,4</sup>,  
Xiaofen Wu<sup>2,3,4</sup>, Xingqiang Li<sup>7</sup>, Kaixuan Lin<sup>2,3,4</sup>, Ruona Shi<sup>2,3,4</sup>, Xiaofei Zhang<sup>1,2,3,4</sup>,  
Dominique Ferrandon<sup>5,8,9</sup>, Jing Liu<sup>1,2,3,4,10</sup>, Duanqing Pei<sup>11</sup>, Jie Wang<sup>1,2,3,4,10\*</sup>, Tao  
Wang<sup>1,2,3,4\*</sup>

<sup>1</sup>University of Chinese Academy of Sciences, Beijing, China. <sup>2</sup>Guangdong Provincial Key Laboratory of Stem Cell and Regenerative Medicine, Guangdong-Hong Kong Joint Laboratory for Stem Cell and Regenerative Medicine, Guangzhou Institutes of Biomedicine and Health, Chinese Academy of Sciences, Guangzhou, China. <sup>3</sup>GIBH-HKU Guangdong-Hong Kong Stem Cell and Regenerative Medicine Research Centre, Guangzhou, China. <sup>4</sup>GIBH-CUHK Joint Research Laboratory on Stem Cell and Regenerative Medicine, Guangzhou, China. <sup>5</sup>Sino-French Hoffmann Institute, Guangzhou Medical University, Guangzhou, China. <sup>6</sup>Department of pediatrics, Foshan maternal and children's hospital affiliated to southern medical university, Foshan, Guangdong 528000. <sup>7</sup>Bioland Laboratory, Guangzhou, China. <sup>8</sup>Université de Strasbourg, Strasbourg, France. <sup>9</sup>Modèles Insectes de l'Immunité Innée, UPR 9022 du CNRS, Strasbourg, France. <sup>10</sup>Joint School of Lifesciences, Guangzhou Institutes of Biomedicine and Health, Chinese Academy of Sciences, Guangzhou, 510530, China, Guangzhou Medical University, Guangzhou, 511436, China. <sup>11</sup>School of Life Sciences, Westlake University, Hangzhou, China. #These authors contributed equally. \*Corresponding authors, wang\_jie01@gibh.ac.cn; wang\_tao@gibh.ac.cn

FigureS1

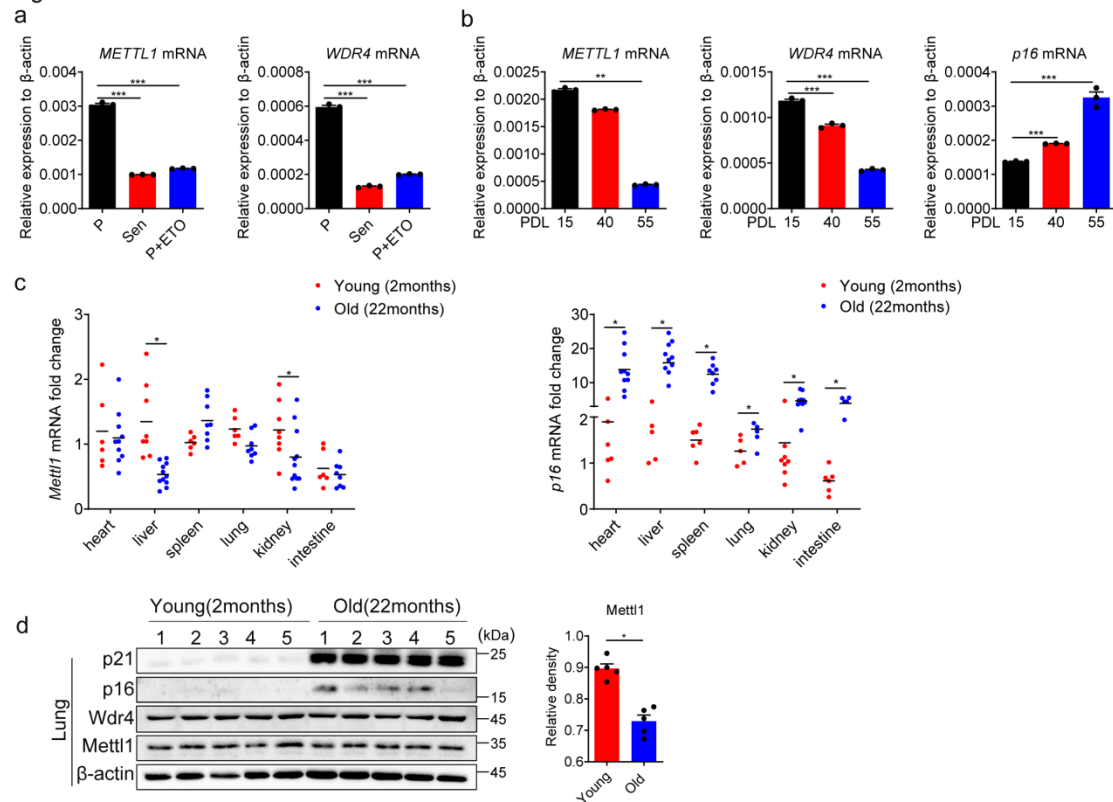

**FigS1. Measurement of METTL1/WDR4 level during senescence and aging.**

**a** METTL1 and WDR4 level were detected in senescence models. P represents proliferating IMR90 cells. Sen refers to senescent IMR90 cells. P+ETO stands for proliferating cells treated with ETO. **b** Transcript levels of METTL1, WDR4, and senescence markers were measured at various time points during senescence using RT-qPCR. **c** Transcription levels of *Mettl1* and *p16* were shown in tissues of young and old mice, n=8 mice per group (4 female and 4 male mice). **d** Protein level of *Mettl1* and *Wdr4* were shown in lung tissues of young and old mice, n=5 mice per group (2 female and 3 male mice). Data in panel **a**, **b** and **c** is presented as mean  $\pm$  SEM, \*\*\* $p < 0.001$ , \* $p < 0.05$ , unless otherwise specified, n = 3. P value was calculated by two sides student's T test. Source data are provided as a Source Data file.

FigureS2

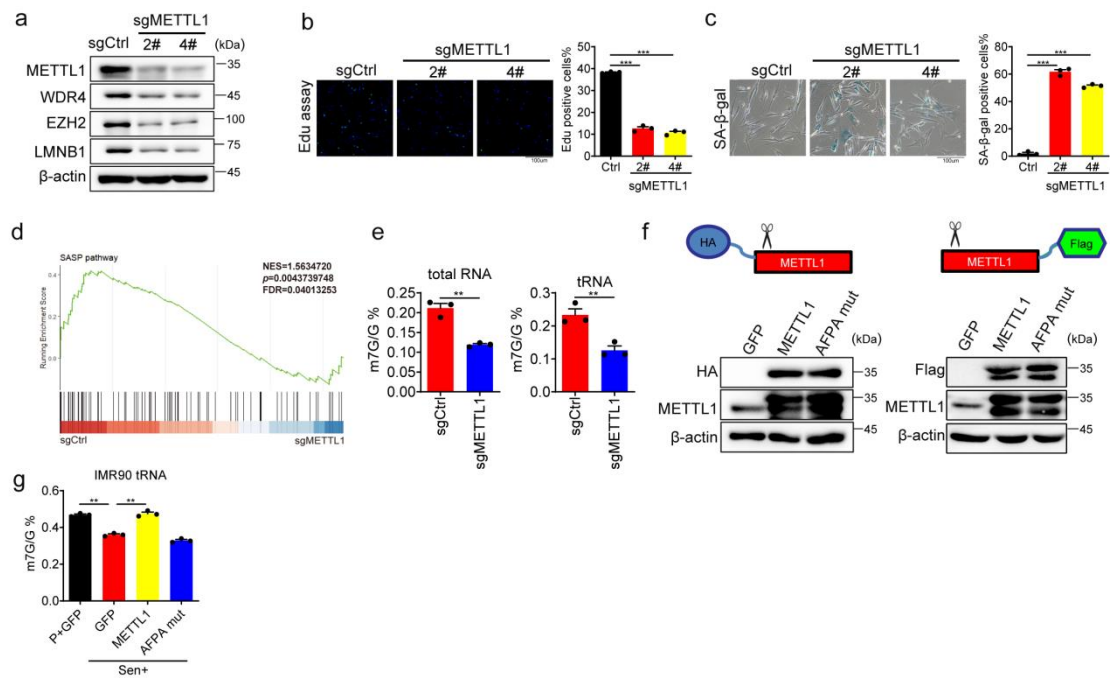

### FigS2.METTL1 Deficiency Accelerate Cell Senescence

**a** METTL1 was depleted by CRISPR in IMR90 cells, senescence status was assessed by assays including western blotting(**a**), SA-β-gal staining(**b**), Edu incorporation(**c**). Scale bar = 100 μm, P values were calculated using a one-tailed Student's t-test. **d** Differentially regulated SASP genes in RNA-Seq of METTL1 knockout cells were enriched using GSEA analysis. **e** m7G levels in total RNA and tRNA from METTL1 KO cells were analyzed using HPLC/MS. Three repeats were conducted. **f** Ectopic expression of METTL1 and AFFA-mut proteins, labeled with a FLAG tag at either the C-terminus or HA at the N-terminus, were detected in IMR90 cells with anti-METTL1 or tag antibodies as indicated. The left panel displays Western blotting using METTL1-FLAG construct; the right panel exhibited Western blotting using HA-METTL1 construct. **g** m7G modification in IMR90 cells with ectopic expression of METTL1 and AFFA-mut was analyzed using HPLC-MS. Source data are provided as a Source Data file.

FigureS3

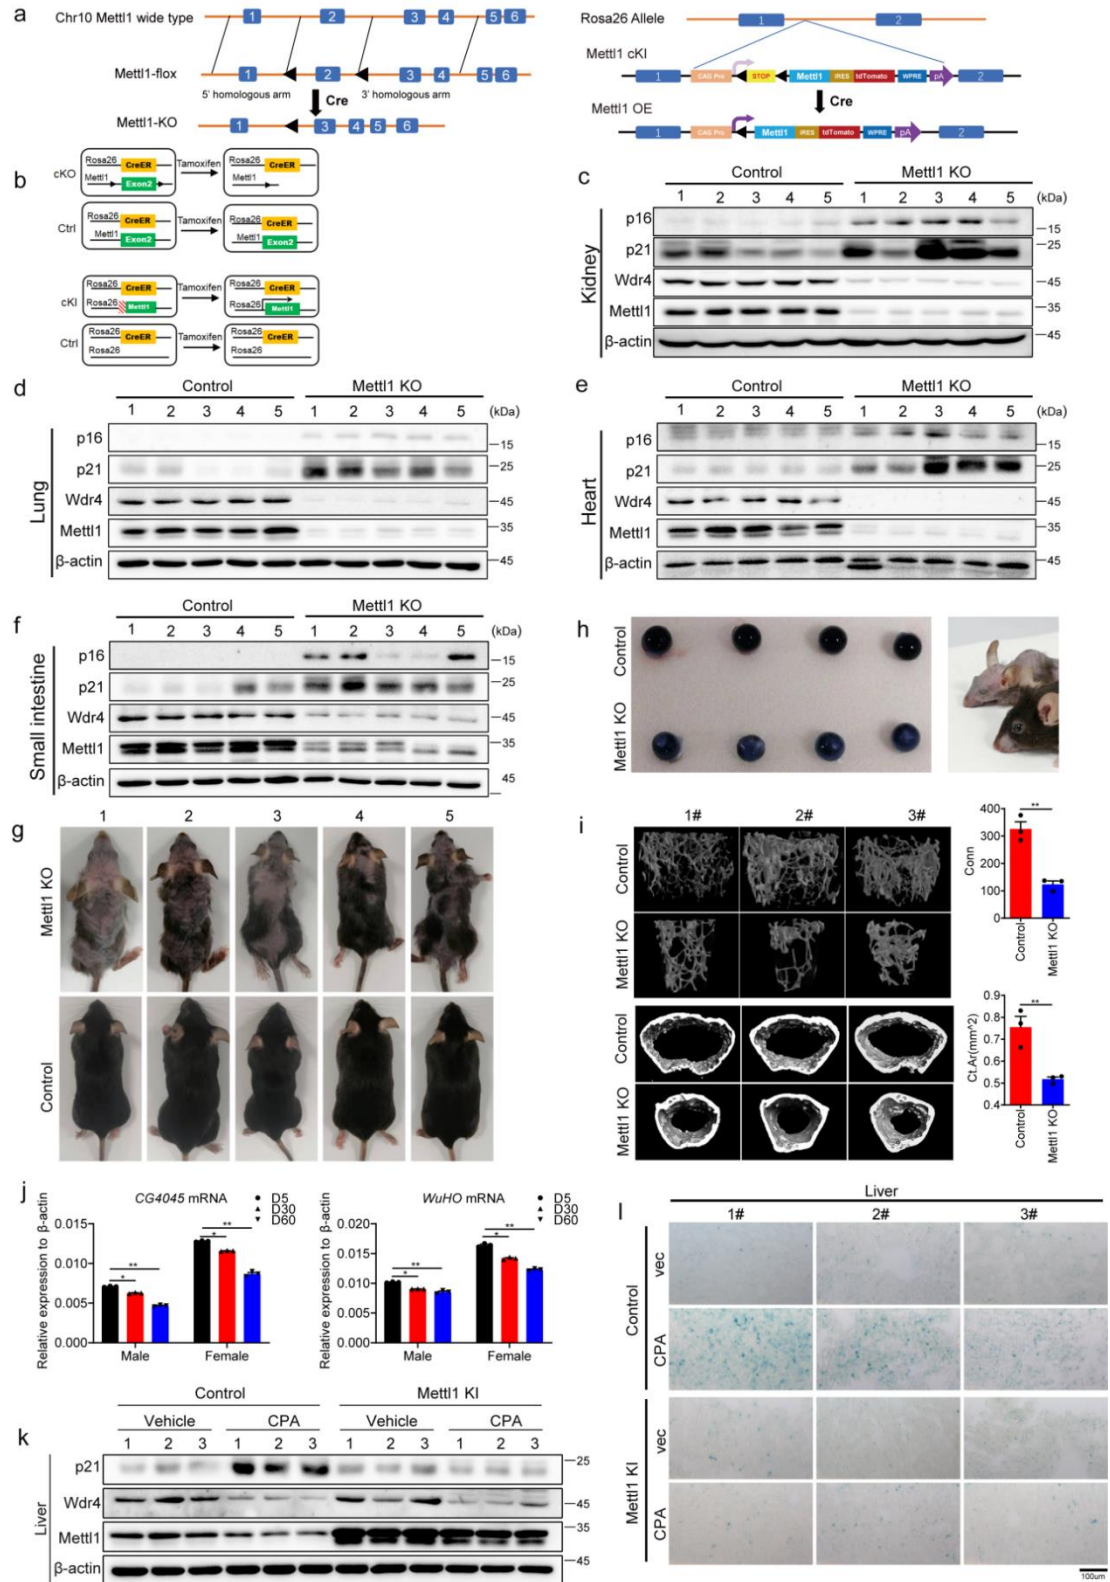

**FigS3. Depletion of *Mettl1* Induces Premature Aging**

**a** Schematic diagram illustrating the construction strategy for conditional *METTL1* knockout and conditional *METTL1* knockin mice (**a**) and the experimental strategy for *METTL1* knockout and conditional *METTL1*

overexpression using *Mettl1*<sup>flox/flox</sup>, *Rosa26*<sup>LSL-Mettl1</sup>, and *Rosa26*<sup>CreERT2</sup> mice(**b**). Western blotting for p16 and p21 in *Mettl1* KO mice were assessed using kidney(**c**), lung (**d**), heart(**e**) and small intestine tissues(**f**), n=5 mice per group (3 female and 2 male). **g** Representative photos of tamoxifen-administered control and knockout mice at 6 months of age. **h** Pictures of eyeballs from *Mettl1* knockout (KO) and control mice were taken to calculate the percentage of cataracts. **i** *Mettl1* knockout (KO) and control mice were euthanized at around 6 months of age to take bones for 3D scanning. Cortical bones from control and *Mettl1* KO mice were calculate the volume and thickness. n=3 mice per group (2 female and 1 male). **j** CG4045 and Wuho transcripts were determined by RT-qPCR using Day5, Day30 and Day60 *Drosophila*. **k** Detection of the *Mettl1*, *Wdr4* proteins and p21 protein in liver with CPA or vehicle treatment as indicated. Representative result was shown, n=3 mice per group (2 female and 1 male). **l** SA- $\beta$ -gal staining was performed on liver sections from the CPA model, n=3 mice per group (2 female and 1 male). Unless otherwise indicated, *in vitro* assays were biologically repeated three times. All data were presented as the mean  $\pm$  SEM. Two-tailed unpaired t-test (**i**), two-way ANOVA with Bonferroni's multiple comparisons test(**j**). \* $p < 0.05$ , \*\* $p < 0.01$ , \*\*\* $p < 0.001$ . Source data are provided as a Source Data file.

FigureS4

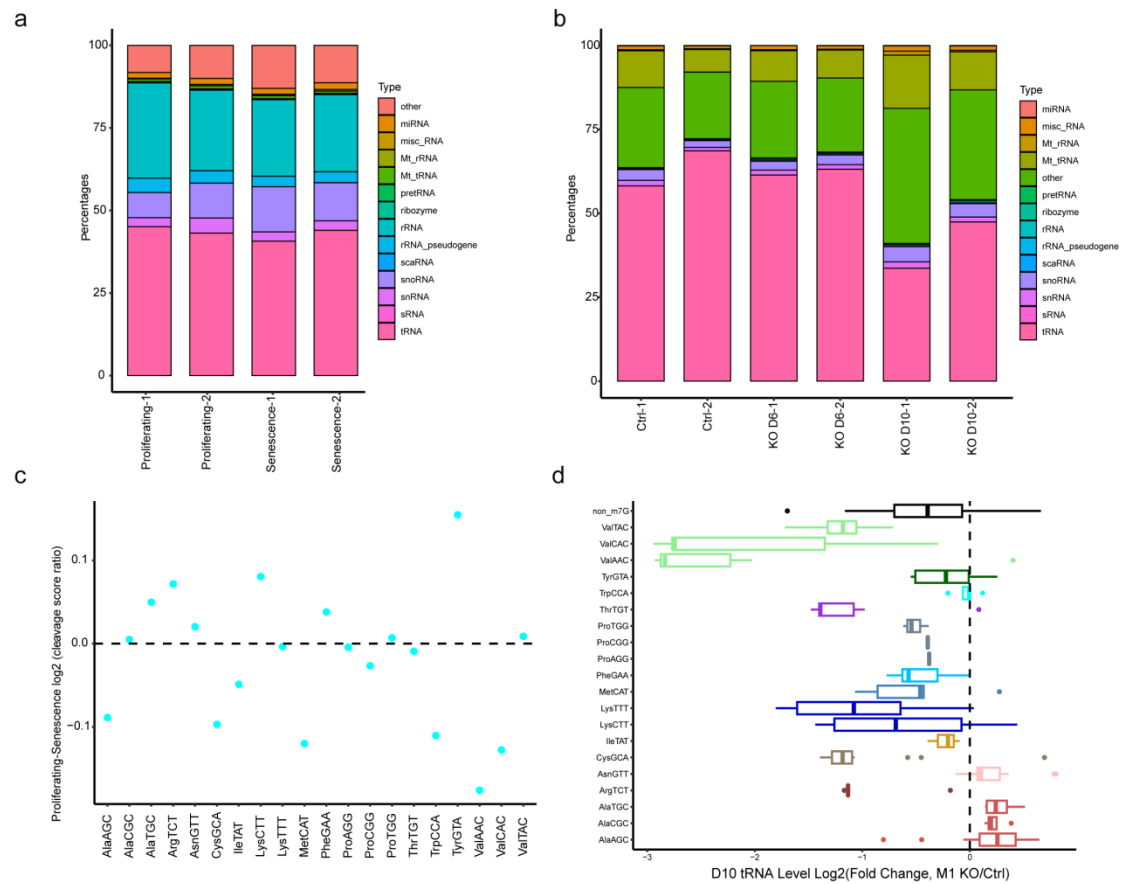

**FigS4. METTL1 Deficiency Downregulates a Group of m7G-tRNAs**

**a** The proportion of small RNAs mapping in tRNA-seq samples from senescence groups was shown. **b** The proportion of small RNAs mapping in tRNA-seq samples from METTL1 knockout (KO) groups was shown. **c** Ratios of cleavage scores in young and senescent cells were characterized. Cleavage Score Ratio = Cleavage Score (Sample 1) / Cleavage Score (Sample 2). **d** Differentially expressed m7G-tRNAs in control/METTL1 KO (Day 10) cells were showed. All tRNA genes of the same tRNA type were combined to calculate their transcript abundance. Source data are provided as a Source Data file.

FigureS5

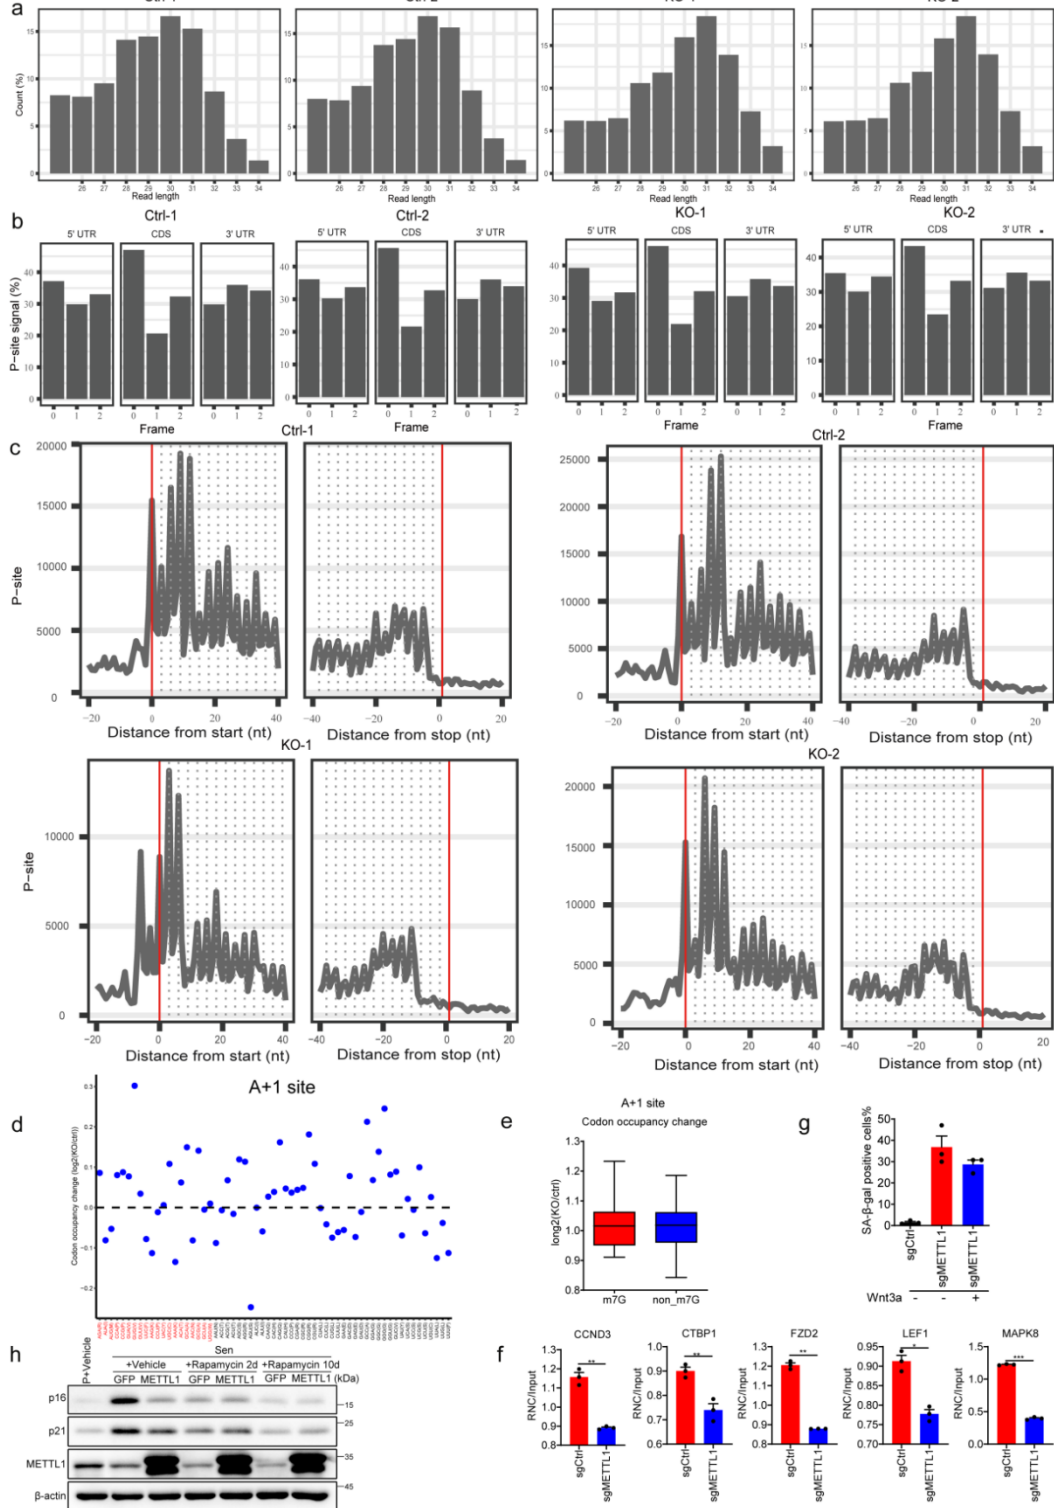

## FigS5.Ribo-Seq Uncover Codon Usage upon Mettl1 Depletion

**a-c** Characteristics of ribosome footprinting. **(a)** Distribution of the read length. **(b)** The percentage of P-sites falling in three possible translation reading frames for 5' UTRs, CDSs, and 3' UTRs in ribosome footprinting data. **(c)** The meta-

profile was generated based on the mapping of P-sites around the start and stop codons of annotated CDSs. **d** Ribosome occupancy at individual codons at the A+1 site. Plots represent the relative ribosome footprinting signals from Mettl1 KO and control cells. The codons are separated into m7G-tRNA decoding codons(red) and non-m7G-tRNA decoding codons(black). **e** Mann-Whitney U test on the the ribosome occupancy at individual codons in A +1 sites from m7G-tRNA and non-m7G-tRNA. The ribosome footprinting signals from METTL1 sgRNA and scramble control were presented. **f** Translation ratios of Wnt signaling pathway proteins were assessed using RNC-qPCR. **g** SA- $\beta$ -gal staining was performed on WNT3a-conditioned medium treated cells as indicated. **h** Protein levels of p16 and p21 in METTL1 overexpressing cells with or without rapamycin(10nM) treatment were conducted. Representative result was shown, three repeats demonstrate similar results (**h**). All the assays were biologically repeated three times(**f,g**). All data were presented as the mean  $\pm$  SEM. Two-tailed unpaired t-test (f), one-way ANOVA with Bonferroni's multiple comparisons test(g). \* $p < 0.05$ , \*\* $p < 0.01$ , \*\*\* $p < 0.001$ . Source data are provided as a Source Data file.

FigureS6

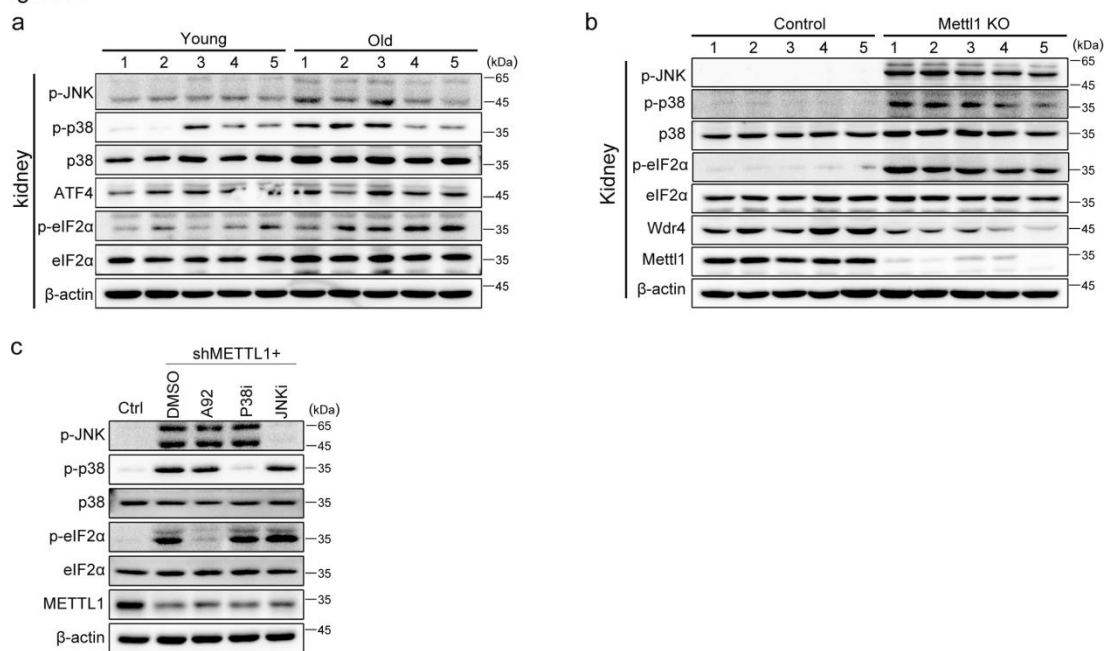



**FigS6.METTL1 Deficiency Elicits Ribotoxic Stress Response and Integrated Stress Response** a ISR and RSR response-relevant proteins were detected by Western blotting using kidney tissues from young/old mouse(a) (n=5 mice per group, 2 female and 3 male) and Mettl1 KO/ control mice(b) (n=5 mice per group, 3 female and 2 male) kidney tissues. c Validation of the effect of GCN2 and p38 inhibitors on METTL1-depleted cells was performed by western blotting to detect eIF2 $\alpha$  and p38 phosphorylation. All WB results were performed three times, the representative result was shown.

FigureS7

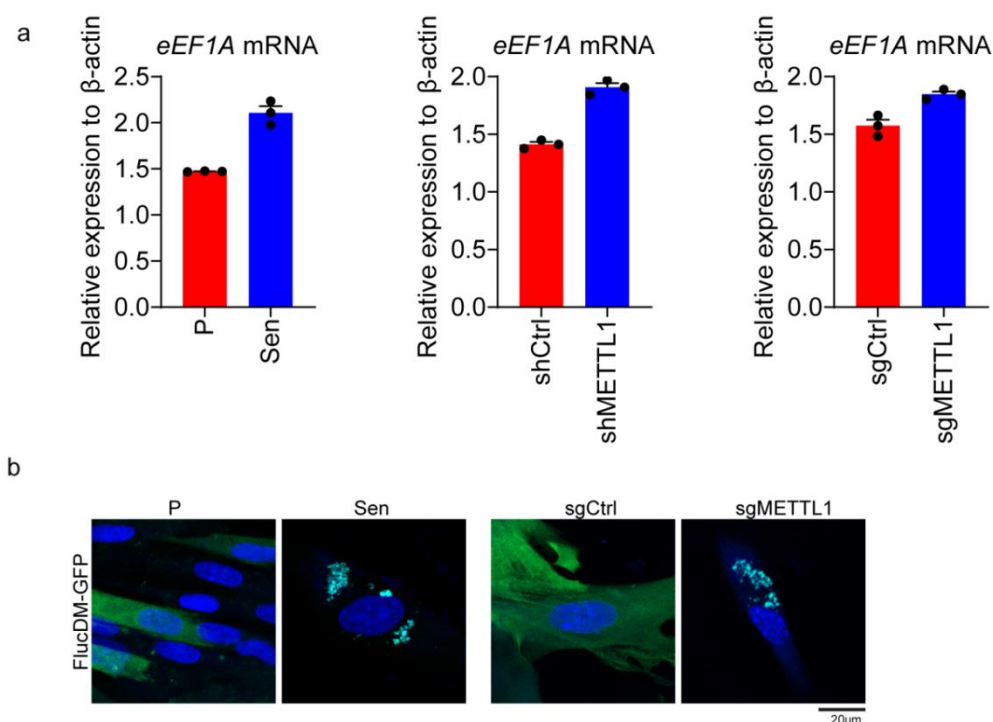

**FigS7. RTD is Involved in the Senescence Caused by METTL1 Deficiency** a eEF1A level was detected by RT-qPCR with samples of replicative senescence, and METTL1 depleted IMR90 cells by shRNAs and sgRNAs. Three repeats were conducted, P values were calculated using a two-tailed Student's T-test. Data was presented as mean  $\pm$  SEM. b Represent images of FlucDM-GFP expressing cells are showed. Source data are provided as a Source Data file.

FigureS8

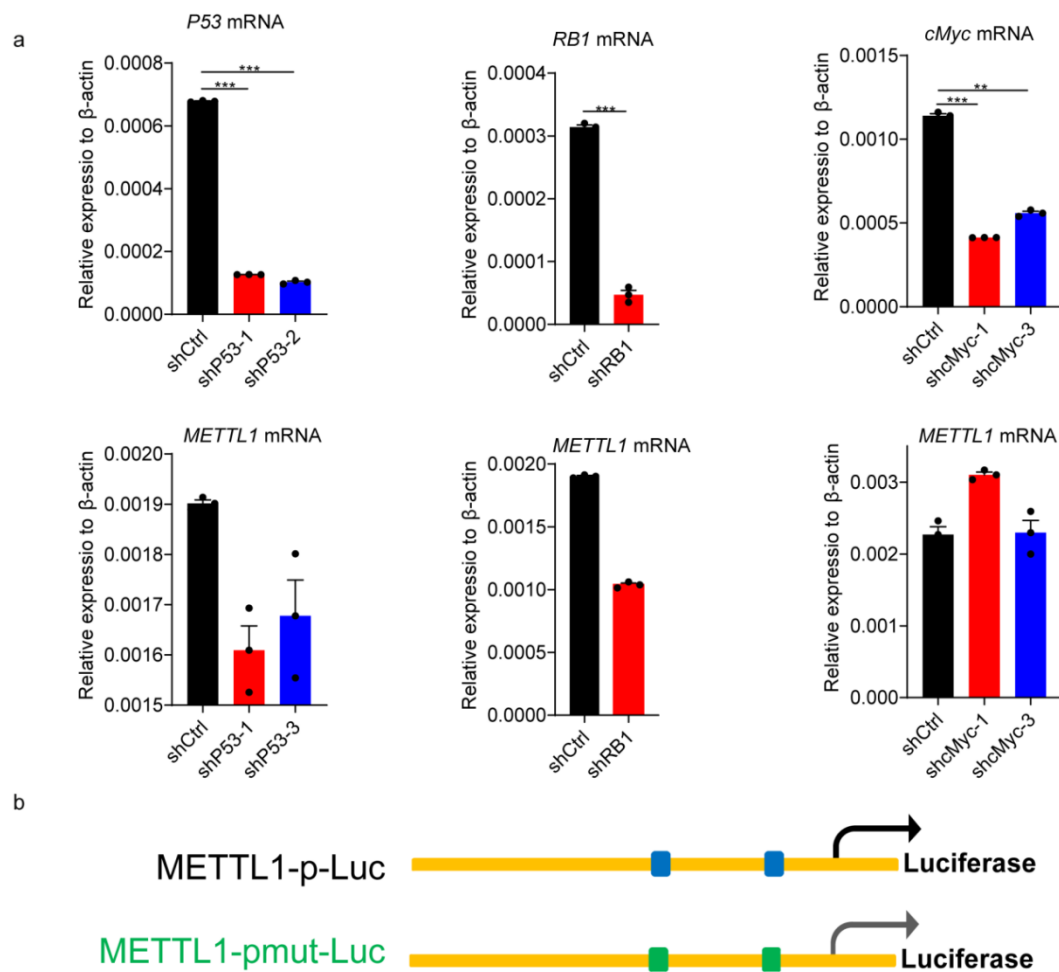

**FigS8. SP1 Regulates METTL1 and WDR4 Expression**

**a** METTL1 level were quantified using RT-qPCR in IMR90 cells with short hairpin RNAs (shRNAs) targeting p53, RB1, and cMyc. Three biologically repeats were conducted. P values were calculated using a two-tailed Student's T-test. Data is presented as mean  $\pm$  SEM. \* $p < 0.05$ , \*\* $p < 0.01$ , \*\*\* $p < 0.001$ . **b** Schematic diagram of dual luciferase reporter gene assay. Source data are provided as a Source Data file.

**Supplementary table 1. shRNA, sgRNA, siRNA targeting sequence and cloning primers**

|                                |                                               |
|--------------------------------|-----------------------------------------------|
| shMETTL1 1#                    | CCCACATTTCAAGCGGACAAA                         |
| shMETTL1 3#                    | GGTGTATACCATAACCGATGT                         |
| shSP1 1#                       | CCACTCCTTCAGCCCTTATTA                         |
| shSP1 2#                       | GGCAGATCTGCAGTCCATTAA                         |
| shP53 1#                       | CACCATCCACTACAACACTACAT                       |
| shP53 2#                       | GTCCAGATGAAGCTCCCAGAA                         |
| shRB1                          | CAGAGATCGTGTATTGAGATT                         |
| shcMyc 1#                      | ATGTCAAGAGGCGAACACAC                          |
| shcMyc 2#                      | GATGAGGAAGAAATCGATG                           |
| sgMETTL1 2#                    | GCAGCGTGCTCACAGCAATC                          |
| sgMETTL1 4#                    | ACATAGGCTGTGGCTATGG                           |
| siZAK $\alpha$ (NM_016653) 1#  | CCCATTAAGTATCAACAGA                           |
| siZAK $\alpha$ (NM_016653) 2#  | CAGACAGAAGCAGGAACAA                           |
| METTL1-F                       | TCGAGACTAGTGTTTATGGCAGCCGAGACT<br>CGGAA       |
| METTL1-R                       | GGCGGGGAAGGCGAAGAACATCTTTGTCA<br>GCT          |
| METTL1-AFPA mut-F1             | TCGAGACTAGTGTTTATGGCAGCCGAGACT<br>CGGAA       |
| METTL1-AFPA mut-F2             | TTCGCCTTCCCCGCCCCACATTTCAAGCGG<br>ACAAA       |
| METTL1-AFPA mut-R1             | ATCCTTGTAAATCGTTGTGACCAGGCAGGCT<br>GGTTT      |
| METTL1-AFPA mut-R2             | GGCGGGGAAGGCGAAGAACATCTTTGTCA<br>GCT          |
| eEF1A-F                        | CTCTAGAGTTTAAACATGGGAAAGGAAAAG<br>ACTCAT      |
| eEF1A-R                        | CTTGTAATCGTTTACGTATTTAGCCTTCTGA<br>GCTTTCT    |
| METTL1-1K-promoter-F           | GTACCGAGCTCTTACGCGTACGATGCCTGT<br>CCCCGCACCCA |
| METTL1-1K-promoter-R           | GATCGCAGATCTCGAGACCAAATCCACGTG<br>GAGGCG      |
| METTL1-1K-promoter-<br>mut-1-F | GGGTCTTTAAATTAATATTCCTGCCACCAAC<br>GCGCATGGCT |
| METTL1-1K-promoter-<br>mut-1-R | GGAATATTAATTTAAAGACCCAAGAGCAAAT<br>TCAGCT     |
| METTL1-1K-promoter-<br>mut-2-F | TTAACTATAGGGTCCGAGACCAGGAGTAAG<br>GG          |
| METTL1-1K-promoter-<br>mut-2-R | GTCTCGGACCCTATAGTTAAGTCTGACTCTT<br>GTGGTCCCGT |

**Supplementary table 2. Antibodies**

| <b>Antibodies</b>                                       | <b>SOURCE</b>             | <b>IDENTIFIER</b>                |
|---------------------------------------------------------|---------------------------|----------------------------------|
| Rabbit polyclonal anti-Mettl1                           | Proteintech               | Cat# 14994-1-AP                  |
| Rabbit polyclonal anti-beta-Actin                       | ABclonal                  | Cat# AC026                       |
| Mouse monoclonal 7-methylguanosine (m7G)                | MBL life science          | Cat# RN017M                      |
| Rabbit monoclonal anti-Wdr4                             | Abcam                     | Cat# ab169526(for human cells)   |
| Rabbit monoclonal anti-Wdr4                             | Siganlway antibody        | Cat# 42846(for mouse cells)      |
| Rabbit polyclonal anti-LMNB1                            | Abcam                     | Cat# ab16048                     |
| Rabbit polyclonal anti-Ezh2                             | Cell Signaling Technology | Cat# 5246T                       |
| Rabbit polyclonal anti-p16 INK4A                        | Proteintech               | Cat# 10883-1-AP(for human cells) |
| Rabbit polyclonal anti-p16 INK4A                        | Siganlway antibody        | Cat# 41296(for mouse cells)      |
| Rabbit polyclonal anti-p21 Waf1/Cip1/CDKN1A             | Proteintech               | Cat# 10355-1-AP                  |
| Rabbit polyclonal anti-eIF2 $\alpha$                    | ABclonal                  | Cat# A0764                       |
| Rabbit polyclonal anti-Phospho-eIF2 $\alpha$ (Ser51)    | Cell Signaling Technology | Cat# 3398                        |
| Rabbit polyclonal anti-ATF4                             | Proteintech               | Cat# 10835-1-AP                  |
| Rabbit polyclonal anti-p38 MAPK                         | ABclonal                  | Cat# A14401                      |
| Rabbit polyclonal anti-Phospho-p38 MAPK (Thr180/Tyr182) | Cell Signaling Technology | Cat# 4511S                       |
| Rabbit polyclonal anti-Phospho-SAPK/JNK (Thr183/Tyr185) | Cell Signaling Technology | Cat# 4668                        |
| Rabbit polyclonal anti-RPL8                             | ABclonal                  | Cat# A10042                      |
| Rabbit polyclonal anti-RPS20                            | Proteintech               | Cat# 15692-1-AP                  |
| Mouse monoclonal anti-puromycine                        | Millipore                 | Cat# MABE343                     |
| Rabbit polyclonal anti- $\beta$ -Catenin                | Proteintech               | Cat# 51067-2-AP                  |
| Mouse monoclonal anti-Digoxigenin (DIG)                 | MBL life science          | Cat# M227-3                      |
| Anti-rabbit IgG HRP-linked Antibody                     | Cell Signaling Technology | Cat# 7074S                       |

|                                    |                           |                 |
|------------------------------------|---------------------------|-----------------|
| Anti-mouse IgG HRP-linked Antibody | Cell Signaling Technology | Cat# 7076S      |
| Rabbit polyclonal anti-eEF1A       | Proteintech               | Cat# 11402-1-AP |
| Rabbit polyclonal anti-SP1         | Proteintech               | Cat# 21962-1-AP |
| Normal Rabbit IgG                  | Cell Signaling Technology | Cat# 2729S      |

**Supplementary table 3. qPCR primers for human, mouse, Drosophila**

| <b>Human</b> |                          |
|--------------|--------------------------|
| actin-F      | AGAAAATCTGGCACCACACC     |
| actin-R      | AGAGGCGTACAGGGATAGCA     |
| p16 INK4A-F  | CCAACGCACCGAATAGTTACG    |
| p16 INK4A-R  | CCATCATCATGACCTGGATCG    |
| METTL1-F     | CGCTACCCTGTGAAGCCAGA     |
| METTL1-R     | AGCGGTGACAGTTCCACTAA     |
| WDR4-F       | CTGGGCTGGCACATGTGTAT     |
| WDR4-R       | GCTGTCATCATCACTGCTTGC    |
| IL1A-F       | TGGTAGTAGCAACCAACGGGA    |
| IL1A-R       | ACTTTGATTGAGGGCGTCATTC   |
| IL1B-F       | CCACCTCCAGGGACAGGATA     |
| IL1B-R       | TGGGATCTACTCTCCAGC       |
| CXCL5-F      | ACAGACCACGCAAGGAGTTC     |
| CXCL5-R      | TCCTTGTTTCCACCGTCCAA     |
| CXCL8-F      | TGGAGAAGTTTTTGAAGAGGGCT  |
| CXCL8-R      | CAACAGACCCACACAATACATGA  |
| IL6-F        | TTCTCCACAAGCGCCTTC       |
| IL6-R        | AGAGGTGAGTGGCTGTCTGT     |
| WNT2-F       | CCGAGGTCAACTCTTCATGGT    |
| WNT2-R       | CCTGGCACATTATCGCACAT     |
| CCND3-F      | GCTTACTGGATGCTGGAGGTAT   |
| CCND3-R      | TGGGGACGCAAGACAGGTA      |
| CTBP1-F      | CAGAGCCATCACAGGCCG       |
| CTBP1-R      | CCTATAGGCAGCCCCATTGAG    |
| FZD2-F       | GTGCCATCCTATCTCAGCTACA   |
| FZD2-R       | CTGCATGTCTACCAAGTACGTG   |
| LEF1-F       | TGCCAAATATGAATAACGACCCA  |
| LEF1-R       | GAGAAAAGTGCTCGTCACTGT    |
| MAPK8-F      | CAGCCCTCTCCTTTAGGTGC     |
| MAPK8-R      | GCTGCTGCTTCTAGACTGCT     |
| eEF1A-F      | GGACACGTAGATTCGGGCAA     |
| eEF1A-R      | AGGAGCCCTTTCCCATCTCA     |
| <b>Mouse</b> |                          |
| actin-F      | CAGAAGGAGATTACTGCTCTGGCT |

|                   |                          |
|-------------------|--------------------------|
| actin-R           | TACTCCTGCTTGCTGATCCACATC |
| Mettl1-F          | ACGCCATGAAACACCTTCCT     |
| Mettl1-R          | TACACCAGGCCCCCGACT       |
| p16 INK4A-F       | CCGCTGCAGACAGACTGG       |
| p16 INK4A-R       | CCATCATCATCACCTGAATCG    |
| <b>Drosophila</b> |                          |
| Wuho-QF           | CAATTTTCGTTTCGCGGAACCC   |
| Wuho-QR           | TACACGATTCTGCGACTGG      |
| CG4045-QF         | GAAGAGGAGGCCAATGCTGA     |
| CG4045-QR         | TCCTAAAGGCGCCGAAAAT      |
| Rpl18-QF          | GTTGCTCCAAACCCTCCA       |
| Rpl18-QR          | GATCCGTCTAACACCTCCC      |

**Supplementary table 4. Northern blotting probes**

|           |                            |
|-----------|----------------------------|
| snoU6     | TGGAACGCTTCACGAATTTG       |
| Val-CAC   | GACCTTTCGCGTGTGAGGCGAAC    |
| Val-AAC   | TGTTTCCGCCCGGTTTCGAA       |
| Val-TAC   | TGGTTCCACTGGGGCTCGAA       |
| Pro-CGG-1 | GGGACCTCTCGCACCCGAAGCGAGAA |
| Pro-CGG-2 | CCGAAGCGAGAATCATACCCCTAG   |
| Cys-GCA-1 | GGGACCTCTTGATCTGCAGTCAAATG |
| Cys-GCA-2 | AGGGGGCACCTGGATTTGAACC     |
| Thr-AGT   | AGGCCTCGCTGGGATTCGAACCC    |

**Supplementary table 5. ChIP-qPCR primers**

|                |                         |
|----------------|-------------------------|
| METTL1-ChIP-F1 | CAGCCCAGCCCAGCTGAA      |
| METTL1-ChIP-R1 | ATCCCAGTCCGGGGTTTCTCT   |
| METTL1-ChIP-F2 | GGACCACAAGAGTCAGACCG    |
| METTL1-ChIP-R2 | CGCCTTCTACAGTGGCATCA    |
| METTL1-ChIP-F3 | GTGTCCCTGTGGAACGAGC     |
| METTL1-ChIP-R3 | TCCACCTCCAGGAAATCGAAC   |
| METTL1-ChIP-F4 | CCACGAAGTGACCATTTCTCCGC |
| METTL1-ChIP-R4 | GTCTTTTCTCCCGTAGGCCCTG  |
| METTL1-ChIP-F5 | GTAGCCGGGTATGGTAGCGCA   |
| METTL1-ChIP-R5 | GGCAGGAAATAAACTCAGGCAGG |
